# Supplementary material
Source: PubMed Central journal article supplement (PMC2812012)
Supplement: NIHMS158621-supplement-01.pdf [file NIHMS158621-supplement-01.pdf]

## Online Appendix 1

## References used in Meta-Analysis

- \*Abel, B. C. (1991). The impact of the transition to parenthood on a marital relationship (Doctoral dissertation, University of Pennsylvania, 1991). *Dissertation Abstracts International*, 52 (5A), 1892.
- \*Ahmad, G. & Najam, N. (1998). A study of marital adjustment during first transition to parenthood. *Journal of Behavioral Sciences*, 9, 67-86.
- \*Barrett, S. J. (1987). Birth of first child in relation to role fulfillment, marital quality, and sexual involvement: A systems approach (Doctoral Dissertation, California School of Professional Psychology, 1987). *Dissertation Abstracts International*, 48 (3B), 870.
- \*Blodgett, W. C. (1981). Modern versus traditional sex role orientations and the transition to parenthood of married couples (Doctoral Dissertation, Temple University, 1981). *Dissertation Abstracts International*, 42 (5B), 2043.
- \*Blum, M. E. (1981). The relationship of marital satisfaction, sex role attitudes, and psychological intervention in prepared delivery classes to the transition to parenthood: A short term longitudinal study of middle-income couples (Doctoral Dissertation, Emory University, 1981). *Dissertation Abstracts International*, 42 (5B), 2094-2095.
- \*Bouchard, G., Boudreau, J., & Hébert, R. (2006). Transition to parenthood and conjugal life: Comparisons between planned and unplanned pregnancies. *Journal of Family Issues*, 27, 1512-1531.
- \*Buist, A., Morse, C. A., & Durkin, S. (2003). Men's adjustment to fatherhood: Implications for obstetric health care. *Journal of Obstetric, Gynecological, & Neonatal Nursing*, 32, 172-180.
- \*Buston, B. G. (1990). The effect of the transition to parenthood on love in married couples

- (Doctoral Dissertation, Virginia Commonwealth University, 1990). *Dissertation Abstracts International*, 50 (8B), 3686.
- \*Campbell, S. M. (1994). Women's expectations and relationship enhancement strategies during the transition to parenthood (Doctoral Dissertation, University of California, Los Angeles, 1994). *Dissertation Abstracts International*, 55 (3B), 1222.
- \*Clements, M. L. (1995). Declines in marital functioning over the transition to parenthood: Can we blame the marriage and not the child? (Doctoral Dissertation, University of Denver, 1995). *Dissertation Abstracts International*, 55 (9B), 4115.
- \*Cobb, R. J. (2002). Attachment and marital quality: Changes in the first years of marriage (Doctoral Dissertation, University of California, Los Angeles, 2002). *Dissertation Abstracts International*, 63 (10B), 4893.
- \*Cook, N. I. (1993). A reconceptualization of the stress of the transition to parenthood (Doctoral Dissertation, University of Houston, 1993). *Dissertation Abstracts International*, 53 (7B), 3834.
- \*Cordova, A. D. (2001). Teamwork and the transition to parenthood (Doctoral Dissertation, University of Denver, 2001). *Dissertation Abstracts International*, 61 (9B), 5052.
- \*Cowan, C. P., Cowan, P. A., Heming, G., Garrett, E., Coysh, W. S., Curtis-Boyles, H., et al. (1985). Transitions to parenthood: His, hers, and theirs. *Journal of Family Issues*, 6, 451-481.
- \*Cox, M. J., Paley, B., Burchinal, M., & Payne, C. C. (1999). Marital perceptions and interactions across the transition to parenthood. *Journal of Marriage and Family*, 61, 611-625.
- \*Dulude, D., Bélanger, C., Wright, J., & Sabourin, S. (2002). High-risk pregnancies, psychological distress, and dyadic adjustment. *Journal of Reproductive and Infant*

*Psychology*, 20, 101-124.

- \*Duncan, S. W. (1984). The transition to parenthood: Coping and adaptation of couples to pregnancy and the birth of their first child (Doctoral Dissertation, University of Minnesota, 1984). *Dissertation Abstracts International*, 45 (5B), 1600.
- \*Gjerdingen, D. K., & Center, B. (2002). A randomized controlled trial testing the impact of a support/work-planning intervention on first-time parents' health, partner relationship, and work responsibilities. *Behavioral Medicine*, 28, 84-91.
- \*Gloger-Tippelt, G., Rapkowitz, I., Freudenberg, I., & Maier, S. (1995). Changes in partnership after the birth of a first child: A comparison of parents and childless couples. *Psychologie in Erziehung und Unterricht*, 42, 255-269.
- \*Grote, N. K., & Clark, M. S. (2001). Perceiving unfairness in the family: Cause or consequence of marital distress? *Journal of Personality and Social Psychology*, 80, 281-293.
- \*Hackel, L. S. (1990). Stability and change in the marital relationship during the transition to parenthood: The role of violated expectations regarding emotional support and the division of household labor (Doctoral Dissertation, New York University, 1990). *Dissertation Abstracts International*, 51 (2B), 985-986.
- \*Hock, E., Schirtzinger, M. B., Lutz, M. B., & Widaman, K. (1995). Maternal depressive symptomatology over the transition to parenthood: Assessing the influence of marital satisfaction and marital sex role traditionalism. *Journal of Family Psychology*, 9, 79-88.
- \*Kurdek, L. A. (1993). Nature and prediction of changes in marital quality for first-time parent and nonparent husbands and wives. *Journal of Family Psychology*, 6, 255-265.
- \*Levy-Shiff, R. (1994). Individual and contextual correlates of marital change across the transition to parenthood. *Developmental Psychology*, 30, 591-601.
- \*Mamott, B. D. (1994). The transition to parenthood: The impact on quality of life (Doctoral

- Dissertation, Illinois Institute of Technology, 1994). *Dissertation Abstracts International*, 54(7B), 3858.
- \*Markman, H. J., & Kadushin, F. S. (1986). Preventive effects of Lamaze training for first-time parents: A short-term longitudinal study. *Journal of Consulting and Clinical Psychology*, 54, 872-874.
- \*Moore, D. R. (2003). Interpersonal processes, relationship satisfaction, and father involvement among young parenting couples: A longitudinal study (Doctoral Dissertation, University of Utah, 2003). *Dissertation Abstracts International*, 64(3B), 1501.
- \*Osofsky, J. D., & Culp, R. (1993). A relationship perspective on the transition to parenthood. In G. H. Pollock & S. I. Greenspan (Eds.), *The course of life, Vol. 5: Early adulthood* (pp. 75-98). Madison, CT: International Universities Press.
- \*Pancer, S. M., Pratt, M., Hunsberger, B., & Gallant, M. (2000). Thinking ahead: Complexity of expectations and the transition to parenthood. *Journal of Personality*, 68, 253-280.
- \*Perren, S., Von Wyl, A., Bürgin, D., Simoni, H., & Von Klitzing, K. (2005). Intergenerational transmission of marital quality across the transition to parenthood. *Family Process*, 44, 441-459.
- \*Porter, C. L., & Hsu, H. (2003). First-time mothers' perceptions of efficacy during the transition to motherhood: Links to infant temperament. *Journal of Family Psychology*, 17, 54-64.
- \*Rholes, W. S., Simpson, J. A., Campbell, L., & Grich, J. (2001). Adult attachment and the transition to parenthood. *Journal of Personality and Social Psychology*, 81, 421-435.
- \*Shapiro, A. F., Gottman, J. M., & Carrère, S. (2000). The baby and the marriage: Identifying factors that buffer against decline in marital satisfaction after the first baby arrives. *Journal of Family Psychology*, 14, 59-70.

- \*Stevens, C. A. (1998). Relationships between role sharing processes and marital adaptation across the transition to parenthood (Doctoral Dissertation, University of Texas Southwestern Medical Center at Dallas, 1998). *Dissertation Abstracts International*, 58(8B), 4529.
- \*Terry, D. J., McHugh, T. A., & Noller, P. (1991). Role dissatisfaction and the decline in marital quality across the transition to parenthood. *Australian Journal of Psychology*, 43, 129-132.
- \*Tietjen, A. M., & Bradley, C. F. (1985). Social support and maternal psychosocial adjustment during the transition to parenthood. *Canadian Journal of Behavioural Science*, 17, 109-121.
- \*Tomlinson, P. S. (1987). Spousal differences in marital satisfaction during transition to parenthood. *Nursing Research*, 36, 239-243.
- \*Tucker, P., & Aron, A. (1993). Passionate love and marital satisfaction at key transition points in the family life cycle. *Journal of Social and Clinical Psychology*, 12, 135-147.
- \*Van Egeren, L. A. (2004). The development of the coparenting relationship over the transition to parenthood. *Infant Mental Health Journal*, 25, 453-477.
- \*Wallace, P. M., & Gotlib, I. H. (1990). Marital adjustment during the transition to parenthood: Stability and predictors of change. *Journal of Marriage and the Family*, 52, 21-29.
- \*Wright, P. J., Henggeler, S. W., & Craig, L. (1986). Problems in paradise? A longitudinal examination of the transition to parenthood. *Journal of Applied Developmental Psychology*, 7, 277-291.

Online Table 1.

*Descriptive Statistics of Studies Included in the Meta-Analysis*

| Variable                                    |                | <i>k</i> | Min   | Max    | <i>M</i> (S.D) | <i>k</i> endorsed (percentage) |
|---------------------------------------------|----------------|----------|-------|--------|----------------|--------------------------------|
| Time of first postnatal assessment (months) | Men            | 30       | 0.5   | 13.5   | 4.74 (3.60)    |                                |
|                                             | Women          | 32       | 0.5   | 13.5   | 4.52 (3.58)    |                                |
|                                             | Couple         | 6        | 1.0   | 6.0    | 2.75 (1.72)    |                                |
| Year of publication                         |                | 37       | 1981  | 2006   | 1994.27 (7.18) |                                |
| Age - Mean                                  | Men            | 31       | 18.30 | 33.30  | 29.41 (2.70)   |                                |
|                                             | Women          | 33       | 16.40 | 31.00  | 27.55 (2.56)   |                                |
| Age - Low                                   | Men            | 16       | 14.00 | 25.00  | 19.56 (2.78)   |                                |
|                                             | Women          | 18       | 14.00 | 24.00  | 19.22 (2.39)   |                                |
| Age - High                                  | Men            | 16       | 24.00 | 60.00  | 42.00 (7.95)   |                                |
|                                             | Women          | 18       | 19.00 | 42.00  | 36.22 (4.87)   |                                |
| Length of marriage – Mean years             |                | 16       | 1.00  | 4.50   | 3.42 (0.81)    |                                |
| Education – mean years                      | Men            | 16       | 12.40 | 27.40  | 15.98 (3.24)   |                                |
|                                             | Women          | 17       | 9.70  | 16.60  | 14.72 (1.53)   |                                |
| Percentage of married participants          |                | 15       | 5.40  | 100.00 | 86.14 (24.87)  |                                |
| Percentage of white participants            |                | 15       | 15.00 | 100.00 | 90.65 (21.26)  |                                |
| Percentage of male infants                  |                | 8        | 43.56 | 75.00  | 56.21 (12.51)  |                                |
| United States (vs. other country)           |                | 29       |       |        |                | 20 (69.0)                      |
| North America (vs. other)                   |                | 29       |       |        |                | 24 (82.8)                      |
| Recruitment                                 | Newspaper      | 36       |       |        |                | 4 (11.1)                       |
|                                             | Prenatal class | 36       |       |        |                | 24 (66.7)                      |
|                                             | OB/GYN/clinic  | 36       |       |        |                | 20 (55.6)                      |
| Method assessment                           | Mail-in packet | 31       |       |        |                | 15 (48.4)                      |
|                                             | Lab            | 31       |       |        |                | 5 (16.1)                       |
|                                             | Home visit     | 31       |       |        |                | 7 (22.6)                       |
|                                             | In class       | 31       |       |        |                | 3 (9.7)                        |
| Assessment                                  | DAS            | 37       |       |        |                | 20 (54.1)                      |
|                                             | MAT            | 37       |       |        |                | 5 (13.5)                       |
|                                             | Other          | 37       |       |        |                | 12 (32.4)                      |
| Inclusion limited to married only           |                | 28       |       |        |                | 15 (53.6)                      |

Online Table 2.

*Effect sizes for Prospective Cohort Design Studies of the Transition to Parenthood (PCD<sub>TIP</sub>) and of Newlywed Couples (PCD<sub>NC</sub>)*

|                                                                   | Effect size (Hedges' <i>g</i> ) |       |         | Time (in months) |
|-------------------------------------------------------------------|---------------------------------|-------|---------|------------------|
|                                                                   | Men                             | Women | Couple* |                  |
| Prospective Cohort Design Studies of the Transition to Parenthood |                                 |       |         |                  |
| Abel (1991)                                                       | --                              | --    | -0.40   | 6.00             |
| Ahmad & Najam (1998)                                              | -0.75                           | -0.45 | --      | 1.50             |
|                                                                   | -0.99                           | -0.93 | --      | 4.50             |
| Barrett (1987)                                                    | -0.23                           | -0.02 | --      | 0.50             |
| Blodgett (1981)                                                   | 0.04                            | -0.12 | --      | 1.50             |
| Blum (1981)                                                       | 0.06                            | 0.00  | --      | 1.00             |
|                                                                   | 0.16                            | -0.19 | --      | 3.00             |
| Bouchard, Boudreau, & Hebert (2006)                               | -0.11                           | -0.25 | --      | 6.00             |
| Buist, Morse, & Durkin (2003)                                     | -0.19                           | --    | --      | 4.00             |
| Buston (1990)                                                     | 0.00                            | -0.13 | --      | 1.75             |
| Campbell (1994)                                                   | --                              | -0.27 | --      | 2.50             |
| Cook (1993)                                                       | -0.05                           | -0.04 | --      | 1.00             |
| Cordova (2001)                                                    | -0.24                           | -0.31 | --      | 3.00             |
| Cowan et al. (1985)                                               | -0.25                           | -0.38 | --      | 6.00             |
| Cox, Paley, Burchinal, & Payne (1999)                             | -0.29                           | -0.50 | --      | 3.00             |
|                                                                   | -0.54                           | -0.65 | --      | 12.00            |
| Dulude, Bélanger, Wright, & Sabourin (2002)                       | -0.29                           | -0.20 | --      | 5.53             |
|                                                                   | -0.32                           | -0.40 | --      | 11.74            |
| Duncan (1984)                                                     | 0.08                            | 0.17  | 0.13    | 2.00             |
| Gjerdingen & Center (2002)                                        | -0.28                           | -0.46 | --      | 6.00             |
| Gloger-Tippelt, Rapkowitz, Freudenberg, & Maier (1995)            | -0.41                           | 0.05  | -0.19   | 2.50             |
|                                                                   | -0.52                           | -0.20 | -0.43   | 5.00             |
|                                                                   | -0.56                           | -0.13 | -0.36   | 13.00            |
| Grote & Clark (2001)                                              | 0.00                            | -0.22 | --      | 6.00             |
|                                                                   | -0.47                           | -0.38 | --      | 13.50            |
| Hackel (1990)                                                     | -0.73                           | -0.46 | --      | 4.00             |
| Hock, Schirtzinger, Lutz, & Widaman (1995)                        | -0.56                           | -0.54 | --      | 9.00             |
| Levy-Shiff (1994)                                                 | -0.22                           | -0.44 | --      | 9.00             |
| Mamott (1994)                                                     | --                              | --    | 0.21    | 2.00             |
| Markman & Kadushin (1986)                                         | -0.17                           | -0.10 | --      | 0.50             |
|                                                                   | -0.57                           | -0.39 | --      | 2.50             |
| Moore (2003)                                                      | -0.32                           | -0.64 | --      | 13.50            |
| Osofsky & Culp (1993)                                             | 0.27                            | -0.17 | --      | 3.00             |
| Pancer, Pratt, Hunsberger, & Gallant (2000)                       | -0.32                           | -0.54 | --      | 6.00             |
| Perren et al. (2005)                                              | -0.62                           | -0.82 | --      | 12.00            |
| Porter & Hsu (2003)                                               | --                              | -0.19 | --      | 1.00             |

|                                                       | Effect size (Hedges' <i>g</i> ) |       |         | Time (in months) |
|-------------------------------------------------------|---------------------------------|-------|---------|------------------|
|                                                       | Men                             | Women | Couple* |                  |
|                                                       | --                              | -0.22 | --      | 3.00             |
| Rholes, Simpson, Campbell, & Grich (2001)             | -0.35                           | -0.43 | --      | 6.00             |
| Stevens (1988)                                        | -0.30                           | -0.52 | --      | 12.00            |
|                                                       | -0.55                           | -0.79 | --      | 30.00            |
| Terry, McHugh, & Noller (1991)                        | 0.00                            | 0.02  | --      | 3.00             |
| Tietjen & Bradley (1985)                              | --                              | 0.00  | --      | 3.00             |
| Tomlinson (1987)                                      | --                              | --    | -0.52   | 3.00             |
| Tucker & Aron (1993)                                  | -0.30                           | -0.25 | --      | 8.30             |
| Van Egeren (2004)                                     | 0.01                            | -0.01 | --      | 1.00             |
|                                                       | -0.03                           | -0.14 | --      | 3.00             |
|                                                       | -0.15                           | -0.39 | --      | 6.00             |
| Wallace & Gotlib (1990)                               | --                              | --    | 0.30    | 1.00             |
|                                                       | --                              | --    | -0.35   | 6.00             |
| Wright et al. (1986)                                  | -0.22                           | -0.29 | --      | 3.50             |
| Prospective Cohort Design Studies of Newlywed Couples |                                 |       |         |                  |
| Parent vs. Non-Parent, Time 1                         |                                 |       |         |                  |
| Clements (1995)                                       | -0.76                           | -1.07 |         |                  |
| Cobb (2002)                                           | 0.39                            | 0.47  |         |                  |
| Kurdek (1993)                                         | -0.09                           | -0.01 |         |                  |
| Shapiro et al. (2000)                                 | 0.33                            | 0.49  |         |                  |
| Parent vs. Non-Parent, Time 2                         |                                 |       |         |                  |
| Clements (1995)                                       | -0.04                           | 0.02  |         |                  |
| Cobb (2002)                                           | 0.05                            | 0.37  |         |                  |
| Kurdek (1993)                                         | -0.22                           | 0.01  |         |                  |
| Shapiro et al. (2000)                                 | 0.18                            | -0.10 |         |                  |
| Parent from Time 1 to Time 2                          |                                 |       |         |                  |
| Clements (1995)                                       | -0.16                           | -0.03 |         |                  |
| Cobb (2002)                                           | -0.33                           | -0.33 |         |                  |
| Kurdek (1993)                                         | -0.20                           | -0.14 |         |                  |
| Shapiro et al. (2000)                                 | -0.15                           | -0.29 |         |                  |
| Non-parent from Time 1 to Time 2                      |                                 |       |         |                  |
| Clements (1995)                                       | -0.86                           | -0.92 |         |                  |
| Cobb (2002)                                           | -0.16                           | -0.22 |         |                  |
| Kurdek (1993)                                         | -0.12                           | -0.15 |         |                  |
| Shapiro et al. (2000)                                 | -0.08                           | 0.01  |         |                  |

\*Couple effect sizes were calculated when relationship satisfaction scores for the couple as a unit were provided by the original study.



Online Table 3

Aggregate effect sizes for Prospective Cohort Design Studies of Transition to Parenthood ( $PCD_{TIP}$ ) and of Newlywed Couples ( $PCD_{NC}$ )<sup>+</sup>

|                                                                   | Men      |                       |                       |               | Women    |                       |                       |               | Couple   |                       |                       |               |
|-------------------------------------------------------------------|----------|-----------------------|-----------------------|---------------|----------|-----------------------|-----------------------|---------------|----------|-----------------------|-----------------------|---------------|
|                                                                   | <i>k</i> | <i>Q</i>              | <i>g</i>              | CI            | <i>k</i> | <i>Q</i>              | <i>g</i>              | CI            | <i>k</i> | <i>Q</i>              | <i>g</i>              | CI            |
| Prospective Cohort Design Studies of the Transition to Parenthood |          |                       |                       |               |          |                       |                       |               |          |                       |                       |               |
| Overall                                                           | 29       | 319.55 <sup>***</sup> | -0.23 <sup>b***</sup> | -0.32 – -0.14 | 31       | 276.11 <sup>***</sup> | -0.27 <sup>b***</sup> | -0.35 – -0.19 | 6        | 252.33 <sup>***</sup> | -0.08 <sup>b</sup>    | -0.39 – -0.23 |
| 0-2.5 months                                                      | 10       | 174.83 <sup>***</sup> | -0.14 <sup>b</sup>    | -0.34 – .06   | 12       | 87.59 <sup>***</sup>  | -0.10 <sup>b</sup>    | -0.21 – -0.02 | 4        | 23.29 <sup>***</sup>  | 0.13 <sup>b</sup>     | -0.03 – -0.29 |
| 3-5.9 months                                                      | 12       | 284.34 <sup>***</sup> | -0.25 <sup>b*</sup>   | -0.45 – -0.05 | 13       | 177.30 <sup>***</sup> | -0.28 <sup>b***</sup> | -0.43 – -0.12 | 2        | 0.60                  | -0.51 <sup>a***</sup> | -0.59 – -0.42 |
| 6-11 months                                                       | 10       | 38.50 <sup>***</sup>  | -0.28 <sup>b***</sup> | -0.37 – -0.19 | 10       | 18.77 <sup>*</sup>    | -0.41 <sup>b***</sup> | -0.48 – -0.34 | 2        | 0.33                  | -0.37 <sup>a***</sup> | -0.43 – -0.30 |
| 12-14 months                                                      | 5        | 11.43 <sup>*</sup>    | -0.45 <sup>b***</sup> | -0.59 – -0.32 | 5        | 17.26 <sup>**</sup>   | -0.57 <sup>b***</sup> | -0.74 – -0.40 | 1        | –                     | –                     | –             |
| Prospective Cohort Design Studies of Newlywed Couples             |          |                       |                       |               |          |                       |                       |               |          |                       |                       |               |
| P vs. NP, T1                                                      | 4        | 7.27                  | 0.12 <sup>a</sup>     | -0.11 – -0.34 | 4        | 11.51 <sup>**</sup>   | 0.10 <sup>b</sup>     | -0.37 – -0.57 |          |                       |                       |               |
| P vs. NP, T2                                                      | 4        | 2.04                  | -0.02 <sup>a</sup>    | -0.25 – -0.20 | 4        | 2.70                  | 0.09 <sup>a</sup>     | -0.14 – -0.31 |          |                       |                       |               |
| P T1 to T2                                                        | 4        | 3.35                  | -0.22 <sup>a***</sup> | -0.31 – -0.14 | 4        | 7.30                  | -0.22 <sup>a***</sup> | -0.30 – -0.13 |          |                       |                       |               |
| NP T1 to T2                                                       | 4        | 5.25                  | -0.13 <sup>a**</sup>  | -0.22 – -0.04 | 4        | 8.61 <sup>*</sup>     | -0.17 <sup>b+</sup>   | -0.34 – -0.01 |          |                       |                       |               |

Notes. P = parent, NP = Non-parent, T1 = Time 1 (an assessment point when all couples were childless and when they were approximately newlyweds), T2 = Time 2 (an assessment point in which some had become parents and when the first-borns were in their first year)

<sup>a</sup> Fixed effects model, <sup>b</sup> Random effects model

<sup>+</sup>  $p = 0.06$ ,  $*$   $p < .05$ ,  $**$   $p < .01$ ,  $***$   $p < .001$

<sup>+</sup>  $PCD_{TIP}$  study assesses couples during pregnancy and at some point in the babies' first year. In comparison, the  $PCD_{NC}$  study has a more complicated design that recruits newlyweds, who are then typically assessed annually for a number of years. The first assessment is within the first few months of marriage, and this served as T1 for parents and non-parents. The T2 time point for parents was the assessment during baby's first year. To determine the T2 data for non-parents, original study investigators either (1) pulled data from the time point that chronologically mapped onto the average couples' latency between marriage and baby's first year (e.g., if parents typically gave birth after 2 years, Year 3 data would be the non-parents' T2 data); or (2) pulled equal numbers of Year 2 non-parent data as parent data, and so on (e.g., if Year 2 fell in baby's first year for 20 parents, investigators would pull Year 2 data for 20 non-parent couples). Therefore, the  $PCD_{NC}$  design captures the time that would be captured in the  $PCD_{TIP}$  study (pregnancy to first year of baby's life) plus the time from just after marriage to pregnancy. Because the parents in both designs show a similar decline, it seems that these groups and designs are roughly comparable, and we should expect the same of non-parents in the  $PCD_{NC}$  design.

Online Table 4  
*Results of moderator analyses using fixed-effects and mixed-effects models for studies*

| Moderator                         | Fixed-effects model     |          |                          |          |                          |          | Mixed-effects model    |          |                         |          |                        |          | Relation to Effect Size                                                                |
|-----------------------------------|-------------------------|----------|--------------------------|----------|--------------------------|----------|------------------------|----------|-------------------------|----------|------------------------|----------|----------------------------------------------------------------------------------------|
|                                   | Men                     |          | Women                    |          | Couple                   |          | Men                    |          | Women                   |          | Couple                 |          |                                                                                        |
|                                   | <i>Q</i> ( <i>df</i> )  | <i>k</i> | <i>Q</i> ( <i>df</i> )   | <i>k</i> | <i>Q</i> ( <i>df</i> )   | <i>k</i> | <i>Q</i> ( <i>df</i> ) | <i>k</i> | <i>Q</i> ( <i>df</i> )  | <i>k</i> | <i>Q</i> ( <i>df</i> ) | <i>k</i> |                                                                                        |
| Time of postnatal assessment      | 33.36(1) <sup>***</sup> | 29       | 124.22(1) <sup>***</sup> | 31       | 143.18(1) <sup>***</sup> | 6        | 4.91(1) <sup>*</sup>   | 29       | 29.91(1) <sup>***</sup> | 31       | 3.73(1) <sup>+</sup>   | 6        | Longer postnatal time, stronger ES. <sup>M,W,C</sup>                                   |
| Year of publication               | 23.57(1) <sup>***</sup> | 29       | 53.90(1) <sup>***</sup>  | 31       | 7.65(1) <sup>**</sup>    | 6        | 3.41(1)                | 29       | 10.25(1) <sup>**</sup>  | 31       | 0.00(1)                | 6        | More recent year, stronger ES. <sup>M,W</sup>                                          |
| Age – Mean                        | 0.34(1)                 | 26       | 8.50(1) <sup>**</sup>    | 28       | na                       | na       | 1.28(1)                | 26       | 0.13(1)                 | 28       | na                     | na       | As age increases, weaker ES. <sup>W</sup>                                              |
| Age – Low                         | 0.04(1)                 | 16       | 23.65(1) <sup>***</sup>  | 18       | na                       | na       | 0.96(1)                | 16       | 2.50(1)                 | 18       | na                     | na       | Higher low age of sample weaker ES. <sup>W</sup>                                       |
| Age – High                        | 0.00(1)                 | 16       | 29.78(1) <sup>***</sup>  | 18       | na                       | na       | 0.43(1)                | 16       | 2.15(1)                 | 18       | na                     | na       | Higher high age of sample weaker ES. <sup>W</sup>                                      |
| Mean years of marriage            | 0.28(1)                 | 11       | 20.82(1) <sup>***</sup>  | 13       | 73.12(1) <sup>***</sup>  | 3        | 0.01(1)                | 11       | 2.53(1)                 | 13       | 3.51(1) <sup>+</sup>   | 3        | Longer relationship, weaker ES. <sup>W,C</sup>                                         |
| Education (mean years)            | 7.03(1) <sup>**</sup>   | 13       | 29.99(1) <sup>***</sup>  | 14       | na                       | na       | 0.62(1)                | 13       | 3.14(1)                 | 14       | na                     | na       | More education, stronger ES <sup>M</sup> ; more education, the weaker ES. <sup>W</sup> |
| Percentage married                | 19.12(1) <sup>***</sup> | 13       | 40.02(1) <sup>***</sup>  | 13       | –                        | –        | 2.84(1)                | 13       | 4.09(1) <sup>*</sup>    | 13       | –                      | –        | More married, weaker ES. <sup>M,W</sup>                                                |
| Percentage white                  | 3.17(1)                 | 12       | 29.14(1) <sup>***</sup>  | 13       | 54.14(1) <sup>***</sup>  | 4        | 0.15(1)                | 12       | 3.28(1)                 | 13       | 1.85(1)                | 4        | More white participants, weaker ES. <sup>W,C</sup>                                     |
| Percentage of male infants        | 0.05(1)                 | 8        | 1.26(1)                  | 8        | –                        | –        | 0.10(1)                | 8        | 0.03(1)                 | 8        | –                      | –        |                                                                                        |
| United States (vs. other country) | 28.10(1) <sup>***</sup> | 23       | 13.33(1) <sup>***</sup>  | 24       | –                        | –        | 2.37(1)                | 23       | 0.30(1)                 | 24       | –                      | –        | Weaker ES in US than other countries. <sup>M,W</sup>                                   |
| North American (vs. other)        | 46.55(1) <sup>***</sup> | 23       | 26.37(1) <sup>***</sup>  | 24       | –                        | –        | 3.72(1) <sup>+</sup>   | 23       | 1.41(1)                 | 24       | –                      | –        | Weaker ES in North America than other. <sup>M,W</sup>                                  |

other)

|                                    |                         |    |                         |    |                          |   |                      |    |                      |    |         |   |                                                                                              |
|------------------------------------|-------------------------|----|-------------------------|----|--------------------------|---|----------------------|----|----------------------|----|---------|---|----------------------------------------------------------------------------------------------|
| Recruitment – Newspaper            | 0.12(1)                 | 28 | 2.03(1)                 | 30 | –                        | – | 0.04(1)              | 28 | 0.20(1)              | 30 | –       | – |                                                                                              |
| Recruitment – Prenatal class       | 57.87(1) <sup>***</sup> | 28 | 38.78(1) <sup>***</sup> | 30 | 146.03(1) <sup>***</sup> | 6 | 4.44(1) <sup>*</sup> | 28 | 3.59(1) <sup>+</sup> | 30 | 2.53(1) | 6 | Weaker ES from prenatal class <sup>M,W</sup> ; stronger ES from prenatal class. <sup>C</sup> |
| Recruitment – OB/GYN/clinic        | 47.58(1) <sup>***</sup> | 28 | 19.38(1) <sup>***</sup> | 30 | 146.03(1) <sup>***</sup> | 6 | 4.40(1) <sup>*</sup> | 28 | 1.73(1)              | 30 | 2.53(1) | 6 | Stronger ES from clinic <sup>M,W</sup> ; weaker ES from clinic. <sup>C</sup>                 |
| Method – mail-in packet            | 5.68(1) <sup>*</sup>    | 25 | 0.02(1)                 | 26 | –                        | – | 0.10(1)              | 25 | 0.01(1)              | 26 | –       | – | Weaker ES with mail-in packets. <sup>M</sup>                                                 |
| Method – Lab visit                 | 36.80(1) <sup>***</sup> | 25 | 24.73(1) <sup>***</sup> | 26 | –                        | – | 2.25(1)              | 25 | 2.61(1)              | 26 | –       | – | Stronger ES when assessed in lab. <sup>M,W</sup>                                             |
| Method – Home visit                | 9.12(1) <sup>**</sup>   | 25 | 18.46(1) <sup>***</sup> | 26 | –                        | – | 0.82(1)              | 25 | 2.36(1)              | 26 | –       | – | Weaker ES when assessed at home. <sup>M,W</sup>                                              |
| Method – In class                  | 0.10(1)                 | 25 | 0.85(1)                 | 26 | –                        | – | 0.01(1)              | 25 | 0.00(1)              | 26 | –       | – |                                                                                              |
| Assessment – DAS vs. MAT vs. other | 8.67(2) <sup>*</sup>    | 29 | 45.66(2) <sup>***</sup> | 31 | –                        | – | 1.62(2)              | 29 | 6.44(2) <sup>*</sup> | 31 | –       | – | Strongest ES when assessments other than DAS and MAT used. <sup>W</sup>                      |
| Assessment – global vs. specific   | 0.00(1)                 | 28 | 6.99(1) <sup>**</sup>   | 30 | –                        | – | 0.00(1)              | 28 | 0.76(1)              | 30 | –       | – | Stronger ES with global assessment. <sup>W</sup>                                             |
| Inclusion limited to married only  | 9.21(1) <sup>**</sup>   | 22 | 24.99(1) <sup>***</sup> | 24 | –                        | – | 1.78(1)              | 22 | 3.39(1)              | 24 | –       | – | Stronger ES when include unmarried. <sup>M,W</sup>                                           |

<sup>+</sup>  $p < .06$ , <sup>\*</sup>  $p < .05$ , <sup>\*\*</sup>  $p < .01$ , <sup>\*\*\*</sup>  $p < .001$

M – men, W – women, C – couples, ES – effect size

Note: When running moderator analyses, some variables were not applicable for a couple-level effect size and are labeled “na”(e.g., average age of individuals), while others were not possible due to low number of couple-level effect size studies and are labeled “–.”

Online Figure Captions

*Online Figure 1.* Inclusion process for articles in the meta-analysis.

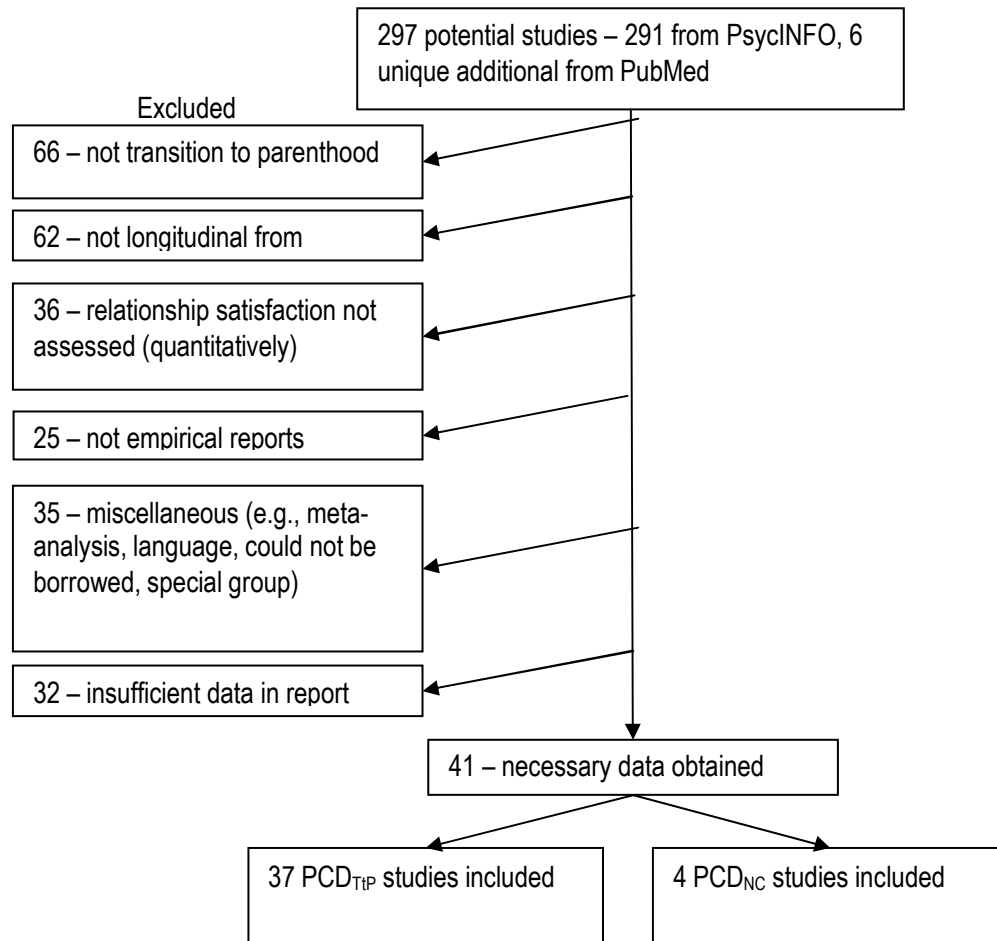

*Notes.* PCD<sub>TIP</sub> = Prospective Cohort Design study of the Transition to Parenthood; PCD<sub>NC</sub> = Prospective Cohort Design study of Newlywed Couples. The elimination process involved an examination of the titles, abstracts, and, when necessary and possible, the actual text of each potential article. Of the 297 potential studies, 66 were excluded because they did not specifically pertain to the transition to parenthood, 62 were excluded because they were not longitudinal from pregnancy (or did not assess relationship satisfaction longitudinally from pregnancy), 36 were excluded because relationship satisfaction was not assessed (or not assessed quantitatively), 25 were excluded because they were not empirical reports (e.g., literature review, erratum, critique, chapter), 16 were derivatives of other articles in the pool of potential studies and were thus combined, 8 were excluded because they were dissertations or studies in foreign journals that could not be obtained, 4 were excluded because they pertained to a particular group (e.g., infertile parents; Cudmore, 2005), 3 were excluded because they were in languages other than those interpretable by the researcher (e.g., Japanese; Onodera, 2005), 3 were excluded because there was an intervention done without a (randomly assigned) control group, and 1 was excluded because it was a meta-analysis on a related topic (parents vs. non-parents; Twenge et al., 2003). For studies that met inclusion criteria and could be obtained, but that contained insufficient data to calculate effect sizes, attempts were made to retain the article. First, other articles by the author(s) were investigated to determine if the necessary data were published elsewhere. If this did not result in the necessary information, attempts to contact the original authors were made. As such, 32 were excluded because the information necessary for effect size computation was not provided and not available through author contact.
